# Supplementary material for: Detection of bacterial contamination in food matrices by integration of quorum sensing in a paper-strip test
Source: Royal Society of Chemistry journal article supplement (doi:10.1039/c8an00878g), 2018-01-01
Supplement: c8an00878g1.pdf [file c8an00878g1.pdf]

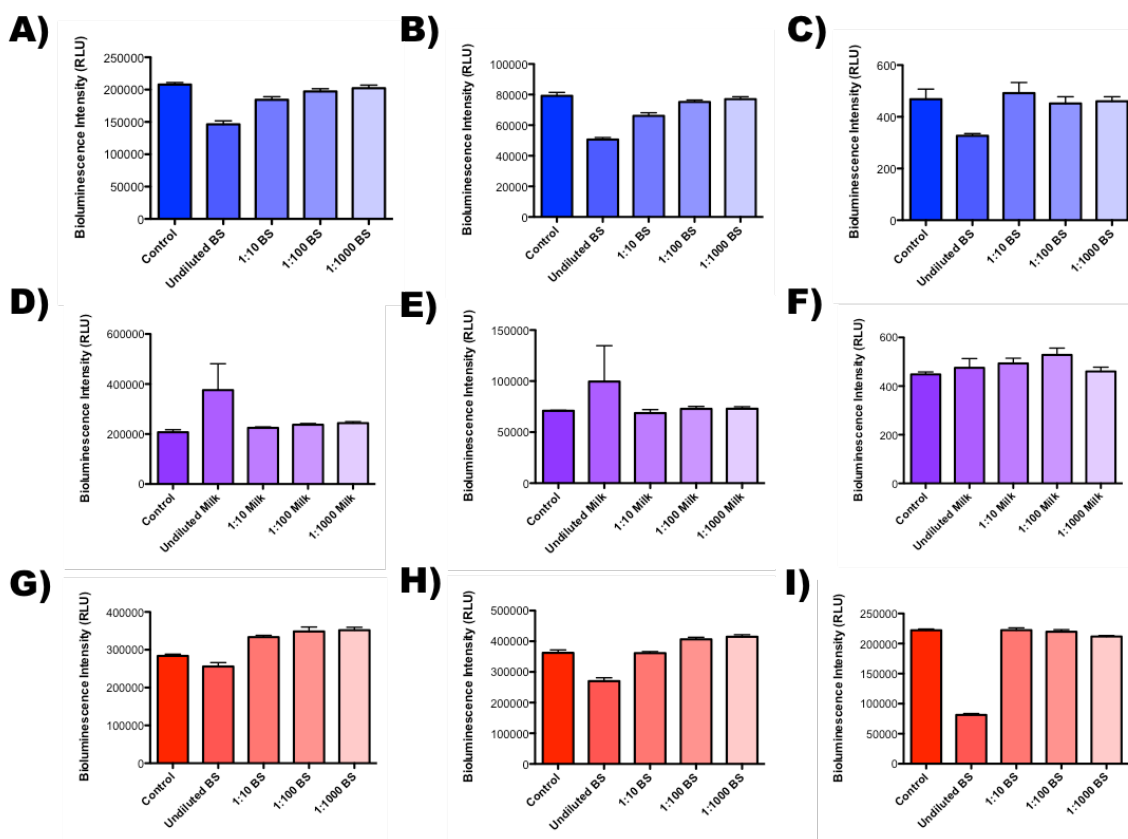

**Supplementary 1.** Effect of food matrices on the whole cell sensing systems and their response in the presence of QSMs (A) Whole cell biosensing system containing plasmid pSB406 for detection of short chain AHLs in beef suspension. (B) Whole cell biosensing system containing plasmid pSB1075 for detection of long chain AHLs in beef suspension. (C) *V. harveyi* MM32-based whole cell biosensing system for detection of AI-2 in beef suspension. (D) Whole cell biosensing system containing plasmid pSB406 for detection of short chain AHLs in skim milk. (E) Whole cell biosensing system containing plasmid pSB1075 for detection of long chain AHLs in skim milk. (F) *V. harveyi* MM32-based whole cell biosensing system for detection of AI-2 in skim milk. (G) Whole cell biosensing system containing plasmid pSB406 for detection of short chain AHLs in beef suspension containing  $1 \times 10^{-6}$  M C-6 HSL. (H) Whole cell biosensing system containing plasmid pSB1075 for detection of long chain AHLs in beef suspension containing  $1 \times 10^{-6}$  M C-12 HSL. (I) *V. harveyi* MM32-based whole cell biosensing system for detection of AI-2 in beef suspension containing  $1 \times 10^{-5}$  M AI-2. Data shown are the average  $\pm$  one SEM (n=3).
